# Supplementary material
Source: HighWire-hosted journal article supplement (http://dmd.aspetjournals.org/highwire/filestream/66403/field_highwire_adjunct_files/0/59477_Supplemental_Data.pdf)
Supplement: 59477_Supplemental_Data.pdf [file 59477_Supplemental_Data.pdf]

## Effect of Prostaglandin E2 On Multidrug Resistance Transporters In Human Placental Cells

*Clifford W. Mason, Gene T. Lee, Yafeng Dong, Helen Zhou, Lily He, and Carl P. Weiner*

Division of Research, Department of Obstetrics and Gynecology, University of Kansas School of Medicine, Kansas City, Kansas, 66208, USA (C.W.M, G.T.L., Y.D., H.Z., L.H., C.P.W.)

Center for the Developmental Origins of Adult Health and Disease, University of Kansas School of Medicine, Kansas City, Kansas, 66208, USA (C.W.M, G.T.L, Y.D., C.P.W)

### Supplemental Data

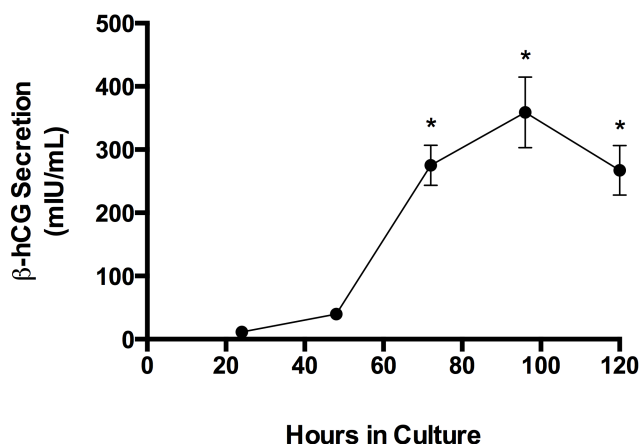

**Supplemental Figure 1.**  $\beta$ -hCG secretion in cytotrophoblasts from 24 – 120h of culture; n = 5 placentas; \* $P < 0.05$ . Data are mean  $\pm$  SEM.

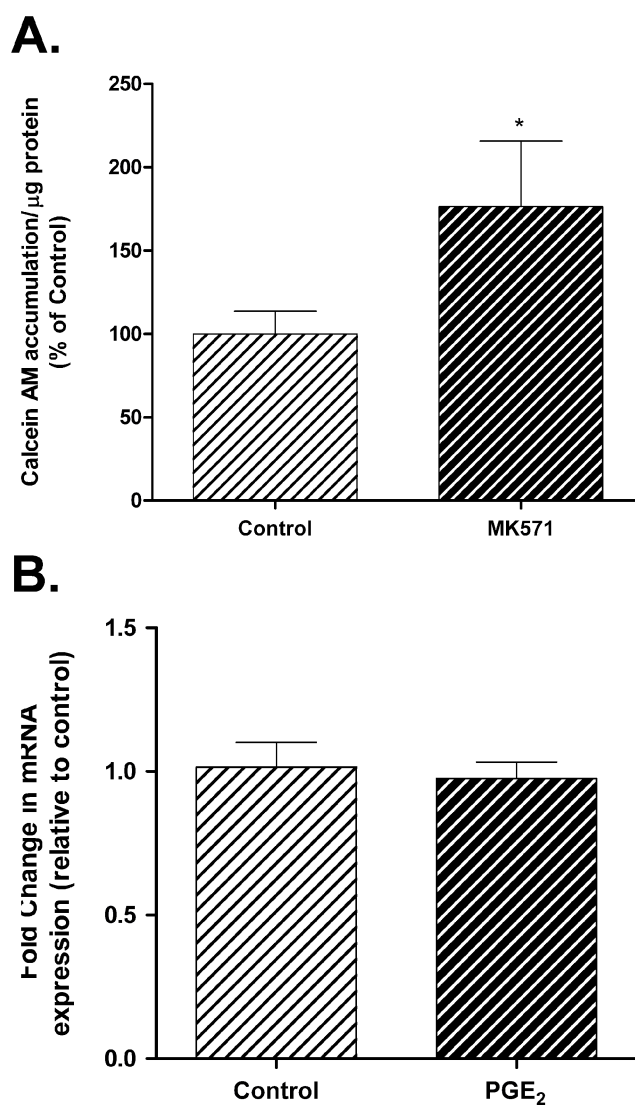

**Supplemental Figure 2.** [A] The functional expression of MRP1 in Jar cells treated with PGE<sub>2</sub> (5 μg/ml). Drug efflux activity was determined after 24h PGE<sub>2</sub> exposure, and selective chemical inhibition of the intracellular accumulation of calcein-AM in the presence of MK571 (5 μM). [B] MRP1 mRNA expression determined by real-time PCR in human placental choriocarcinoma Jar cells (*n* = 3) stimulated with PGE<sub>2</sub> (5 μg/ml) for 24h. Samples were normalized to the endogenous reference gene, 18s rRNA, and

expressed relative to the vehicle control. Data are presented as mean  $\pm$  S.E.M. \*,  $P < 0.05$  was considered to be significant.
